# Supplementary material
Source: PubMed Central journal article supplement (PMC4316379)
Supplement: NIHMS650553-supplement-1.pdf [file NIHMS650553-supplement-1.pdf]

**Table S1. Amino acid concentrations in pancreatic tumor and benign adjacent tissues.**

Concentrations in nmol/mg (wet weight) and  $\mu\text{M}$  (assuming 1g = 1ml). Quantitation was performed by using  $^{13}\text{C}$ -labeled standards for each amino acid, which were added before extraction. Values are means of 8 tissue pairs  $\pm$  SD.

| AA            | nmol/mg         |                 | $\mu\text{M}$       |                     |
|---------------|-----------------|-----------------|---------------------|---------------------|
|               | Benign adjacent | Tumor           | Benign adjacent     | Tumor               |
| Alanine       | 3.17 $\pm$ 2.38 | 0.96 $\pm$ 0.46 | 3168.3 $\pm$ 2379.0 | 960.8 $\pm$ 464.8   |
| Arginine      | 0.12 $\pm$ 0.09 | 0.14 $\pm$ 0.07 | 118.5 $\pm$ 92.4    | 136.9 $\pm$ 70.0    |
| Asparagine    | 0.28 $\pm$ 0.05 | 0.18 $\pm$ 0.05 | 277.9 $\pm$ 52.8    | 182.4 $\pm$ 48.4    |
| Aspartate     | 0.82 $\pm$ 0.47 | 0.36 $\pm$ 0.20 | 821.1 $\pm$ 471.9   | 362.9 $\pm$ 200.9   |
| Glutamate     | 3.75 $\pm$ 2.48 | 2.35 $\pm$ 1.39 | 3746.2 $\pm$ 2479.5 | 2345.6 $\pm$ 1386.2 |
| Glutamine     | 1.71 $\pm$ 0.64 | 0.69 $\pm$ 0.34 | 1705.2 $\pm$ 644.6  | 692.2 $\pm$ 337.5   |
| Glycine       | 2.53 $\pm$ 2.03 | 0.99 $\pm$ 0.49 | 2529.6 $\pm$ 2027.0 | 988.7 $\pm$ 491.0   |
| Histidine     | 0.27 $\pm$ 0.23 | 0.13 $\pm$ 0.07 | 268.9 $\pm$ 234.6   | 129.2 $\pm$ 65.9    |
| (iso)Leucine  | 0.25 $\pm$ 0.08 | 0.34 $\pm$ 0.05 | 245.7 $\pm$ 76.0    | 337.1 $\pm$ 51.0    |
| Lysine        | 0.45 $\pm$ 0.32 | 0.27 $\pm$ 0.13 | 453.3 $\pm$ 321.1   | 267.6 $\pm$ 130.5   |
| Methionine    | 0.04 $\pm$ 0.02 | 0.06 $\pm$ 0.02 | 35.6 $\pm$ 17.4     | 59.4 $\pm$ 16.5     |
| Phenylalanine | 0.07 $\pm$ 0.06 | 0.07 $\pm$ 0.06 | 75.0 $\pm$ 57.8     | 74.7 $\pm$ 55.4     |
| Proline       | 0.62 $\pm$ 0.49 | 0.33 $\pm$ 0.16 | 621.6 $\pm$ 485.4   | 329.5 $\pm$ 162.2   |
| Serine        | 0.49 $\pm$ 0.34 | 0.19 $\pm$ 0.08 | 485.4 $\pm$ 340.5   | 187.9 $\pm$ 82.0    |
| Threonine     | 0.44 $\pm$ 0.34 | 0.18 $\pm$ 0.07 | 436.5 $\pm$ 344.3   | 183.3 $\pm$ 71.3    |
| Tryptophan    | 0.04 $\pm$ 0.01 | 0.05 $\pm$ 0.01 | 42.1 $\pm$ 10.0     | 51.5 $\pm$ 9.7      |
| Tyrosine      | 0.09 $\pm$ 0.05 | 0.15 $\pm$ 0.05 | 94.2 $\pm$ 54.0     | 154.0 $\pm$ 53.5    |
| Valine        | 0.36 $\pm$ 0.20 | 0.35 $\pm$ 0.14 | 358.3 $\pm$ 201.0   | 355.0 $\pm$ 138.0   |

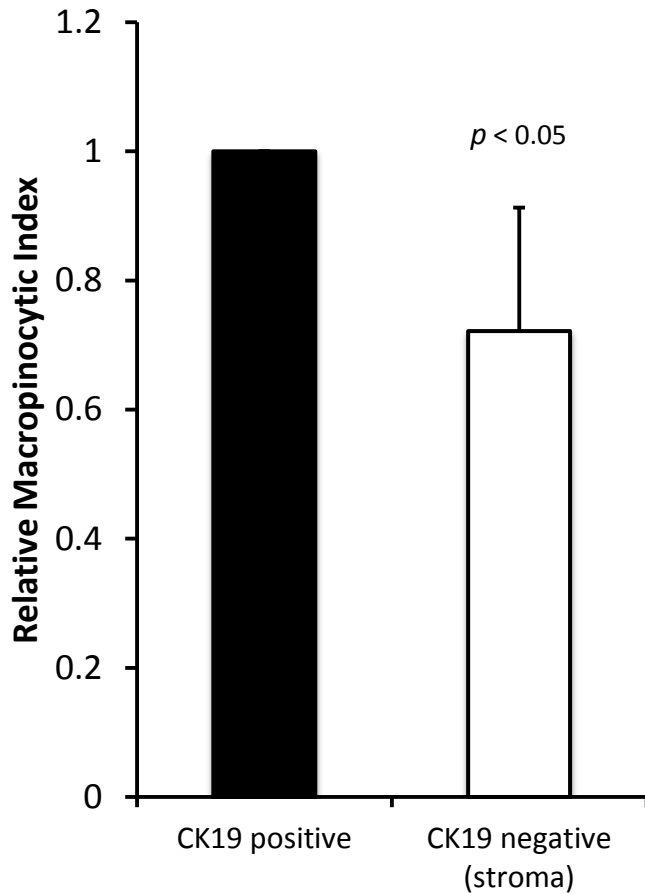

**Figure S1. Quantification of macropinocytosis in human pancreatic tumors.** Macropinocytic index of CK19-positive cells versus the stroma was computed as previously described (ref 21 of main text) and data are presented relative to the values obtained for the CK19-positive cells from the same sections. Error bar indicates mean values  $\pm$  s.d, from 3 different patients,  $p$ -value is by paired t-test.

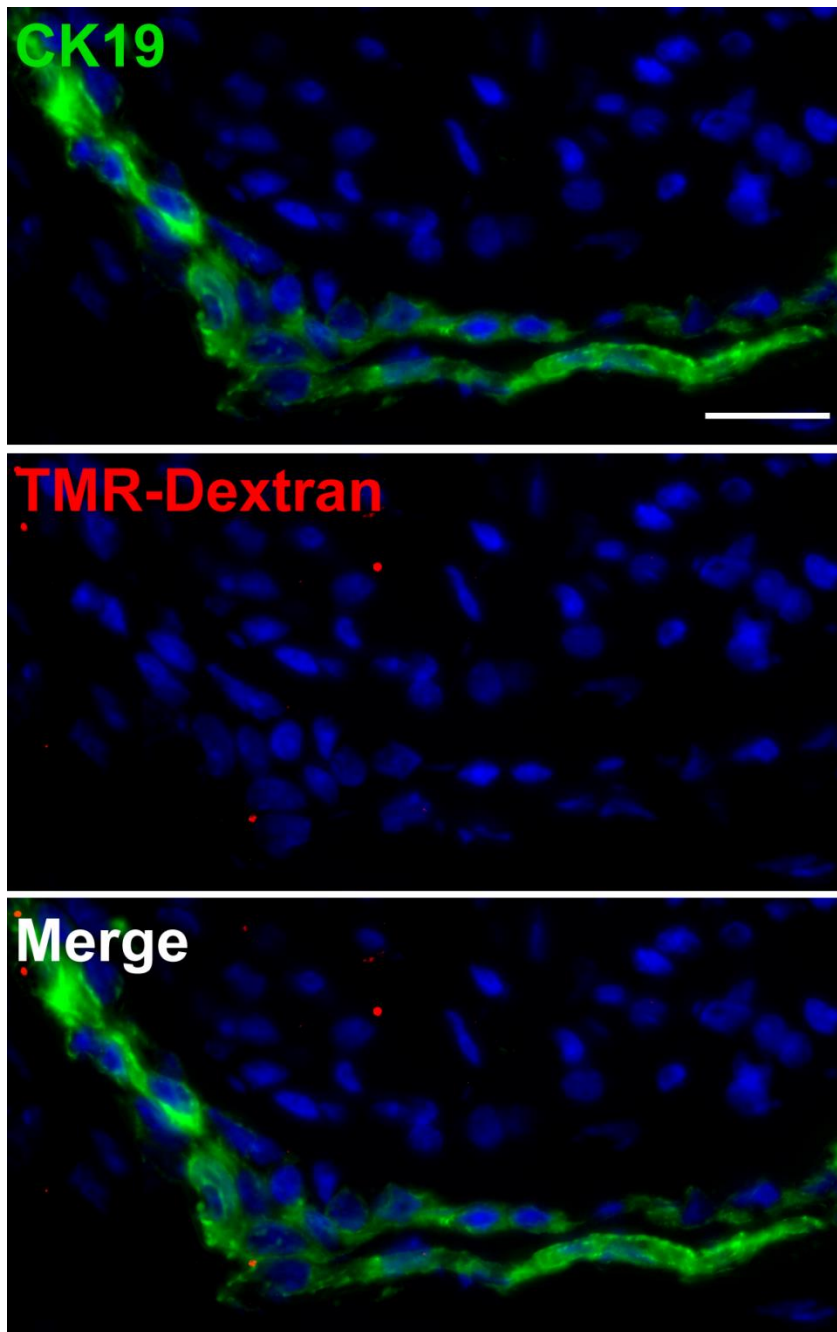

**Figure S2. Few macropinosomes are present in the normal pancreatic tissue adjacent to PDAC tumors.** An *ex vivo* macropinocytosis uptake assay using TMR-dextran as a marker of macropinosomes (red) indicates that CK19-positive ductal cells (green) display low levels of macropinocytosis. DAPI staining (blue) identifies nuclei. Images shown are Z-stack projections and are representative of five independent samples. Scale bar is 20  $\mu\text{m}$ .

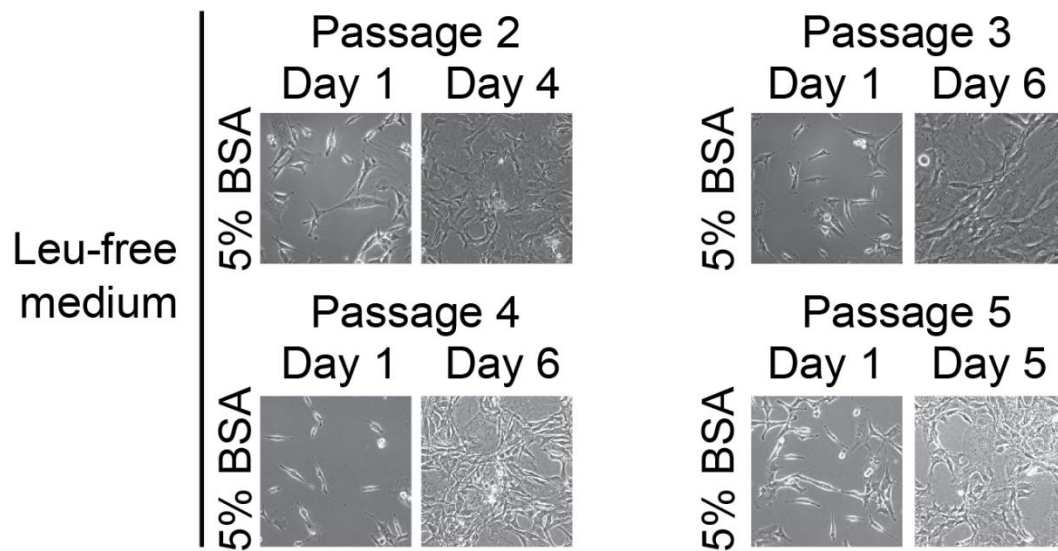

**Figure S3. Ras-mutant pancreatic cells are capable of indefinite growth in medium lacking leucine supplemented with physiological levels of serum protein.** KRPC cells which had grown to confluence in leucine-free medium supplemented with 50 g/L BSA were continually passaged in this medium without exposure to leucine-containing medium.

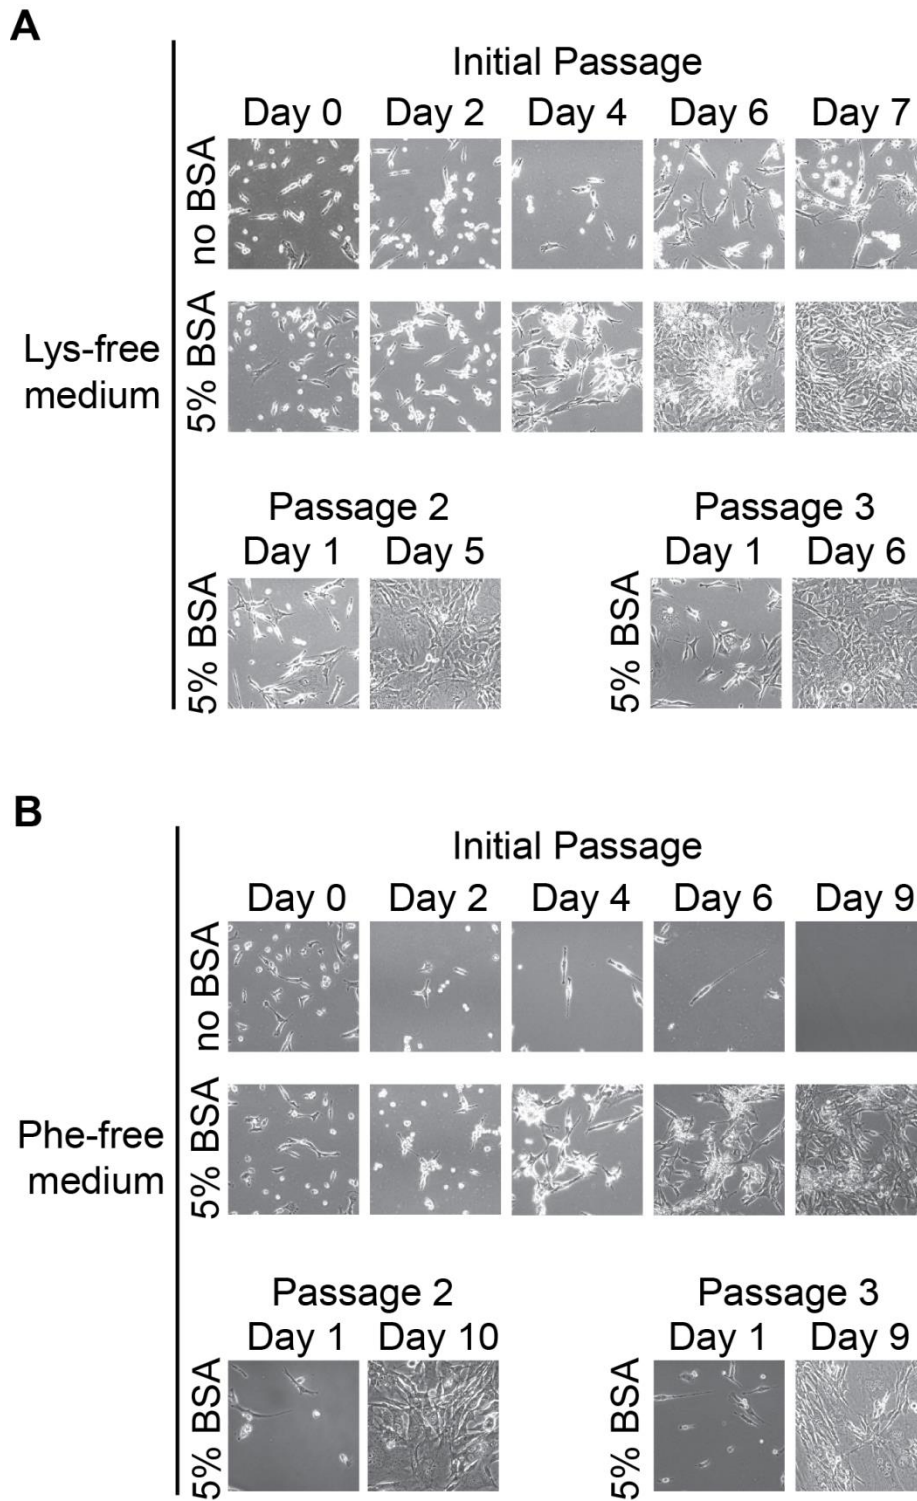

**Figure S4. Ras-mutant pancreatic cells are capable of indefinite growth in medium lacking lysine or phenylalanine supplemented with physiological levels of serum protein.** Images of KRPC cells cultured in lysine- (A) or phenylalanine-free (B) medium in the presence or absence of supplemented (50 g/L) BSA.

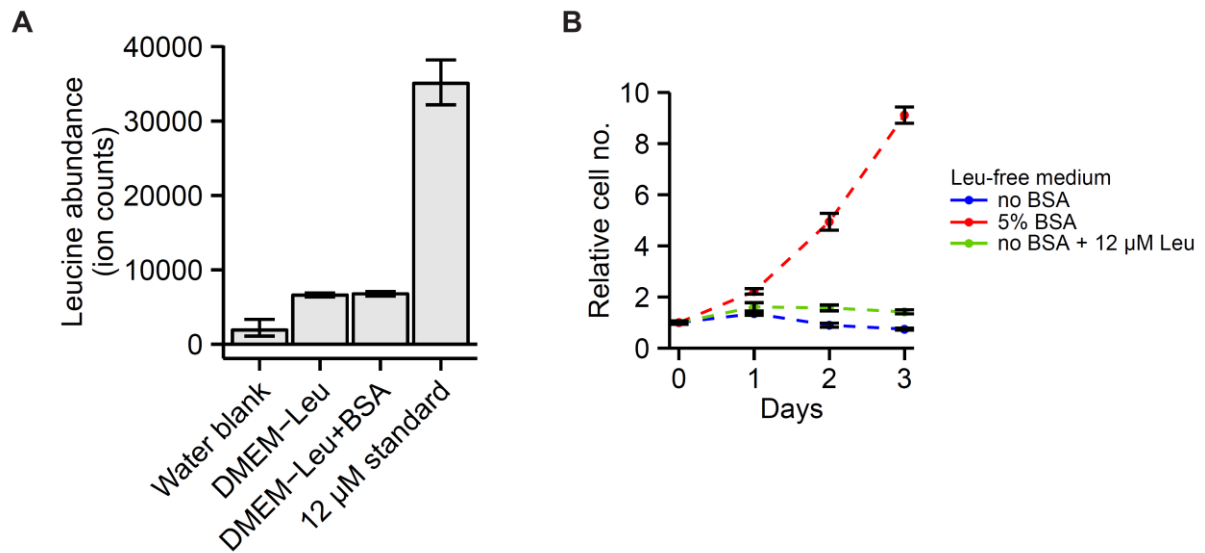

**Figure S5. Growth of KRPC cells in leucine-free medium with 50 g/L serum protein cannot be explained by the presence of contaminating leucine.** (A) Leucine-free medium with or without 50 g/L BSA as well as a water blank and a 12  $\mu$ M leucine standard solution were extracted and analyzed by LC-MS (methods). (B) KRPC cells were grown in leucine-free medium supplemented with 50 g/L BSA, 12  $\mu$ M leucine, or with no supplement, and cell number was measured every 24 h.

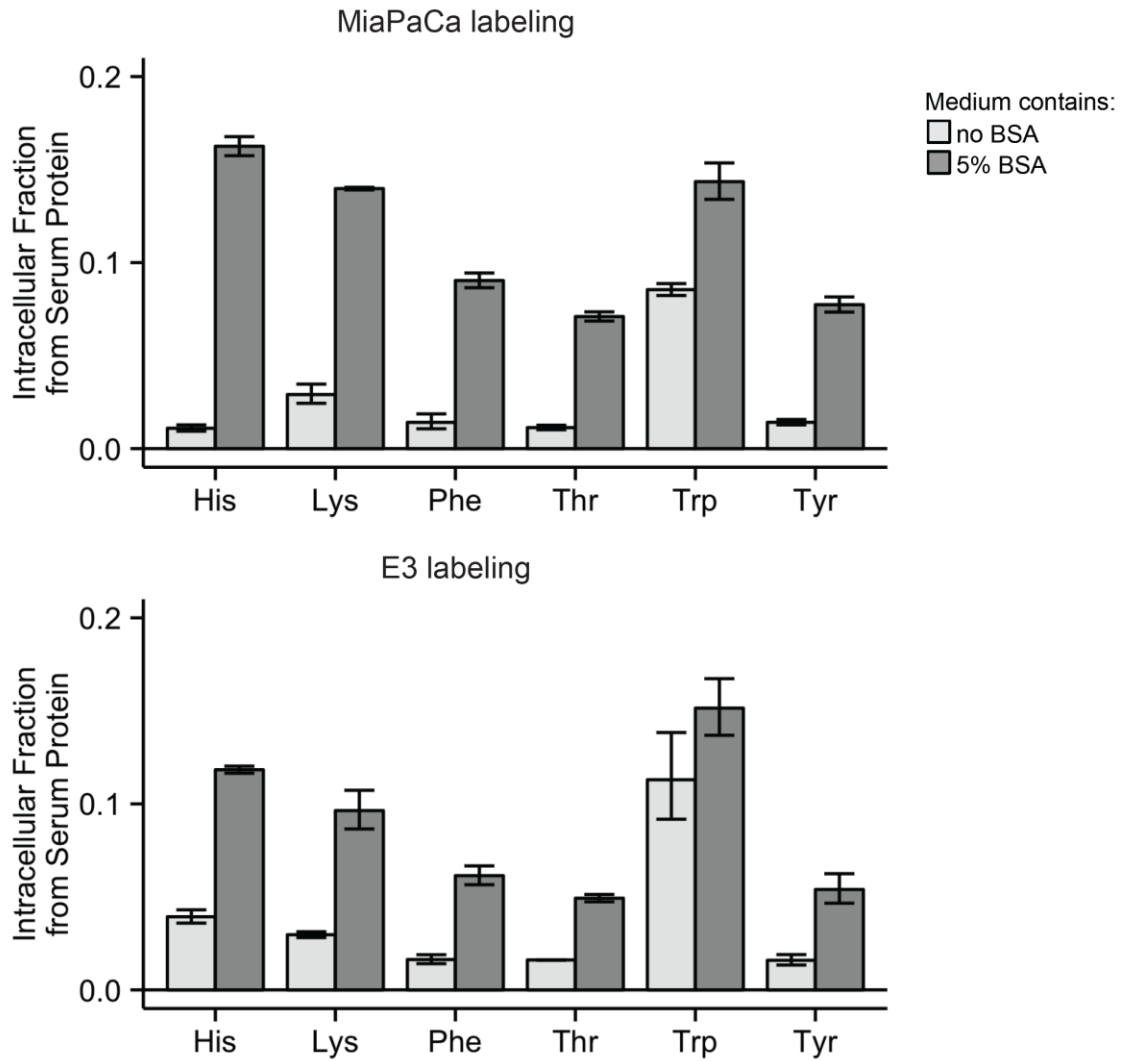

**Figure S6. Stable isotope tracing reveals significant contribution of serum protein to amino acid pools in human PDAC cells.** MiaPaCa2 (A) and E3 (B) cells were grown in  $^{13}\text{C}$ ,  $^{15}\text{N}$ -DMEM for five generations, after which they were transferred to  $^{13}\text{C}$ ,  $^{15}\text{N}$ -DMEM with amino acids present at 10% DMEM concentrations in the presence or absence of supplemented (50 g/L) BSA. After 24 h, metabolites were extracted, and the fractional contribution of serum protein to intracellular amino acid pools is shown.

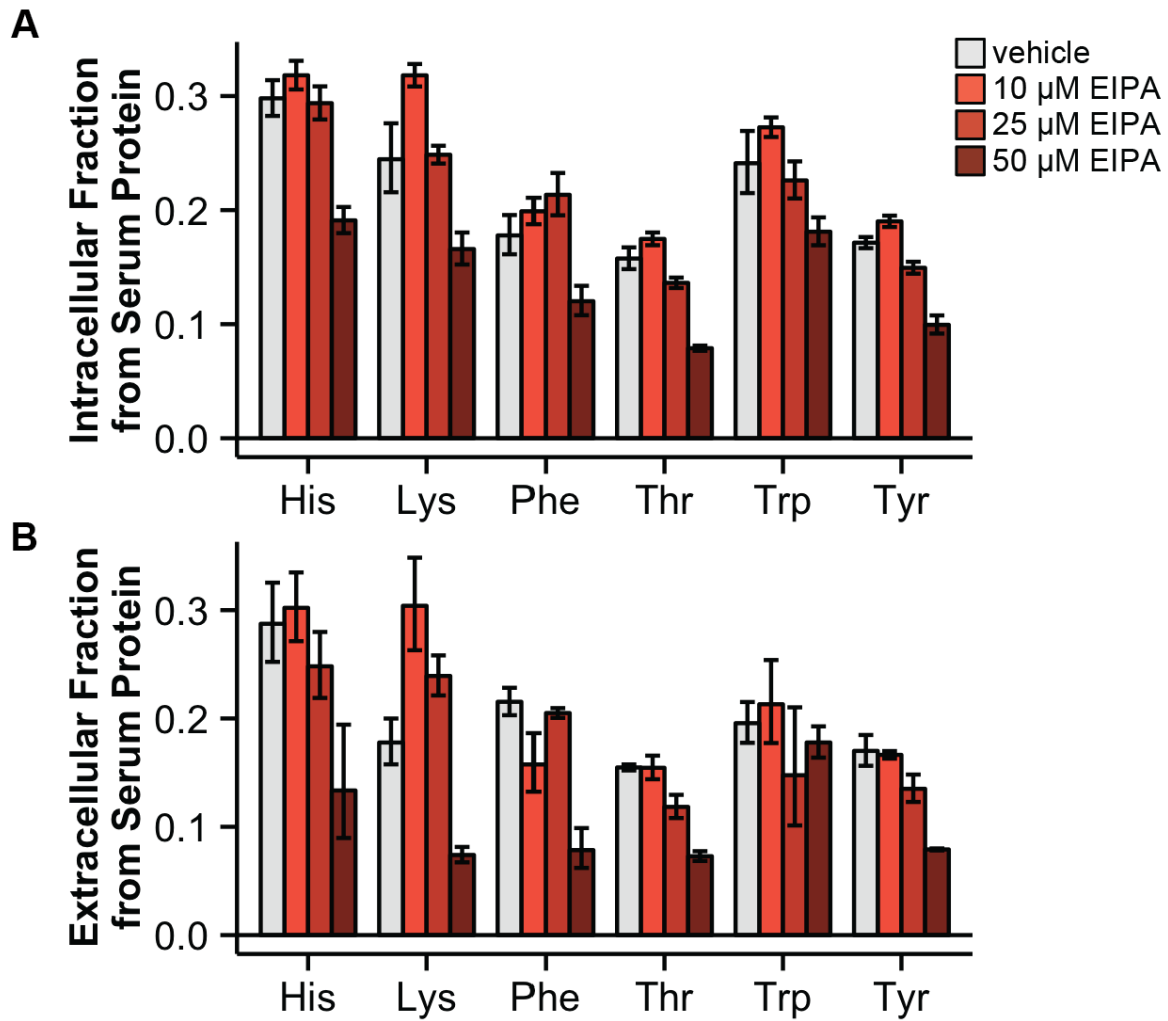

**Figure S7.** EIPA, an inhibitor of macropinocytosis, reduces intracellular (A) and extracellular (B) serum protein-derived amino acid pools in a dose-dependent fashion. Note that inhibition of macropinocytosis by EIPA may be incomplete, even at the highest tested dose of 50  $\mu$ M (further dose escalation resulted in general cellular toxicity and was thus not feasible). Data are means  $\pm$  SE of  $n \geq 3$ . The effect of EIPA on unlabeled fraction was significant for all intracellular amino acids (panel A) and for all media amino acids except histidine and tryptophan (panel B) (ANOVA,  $p < 0.05$ ).



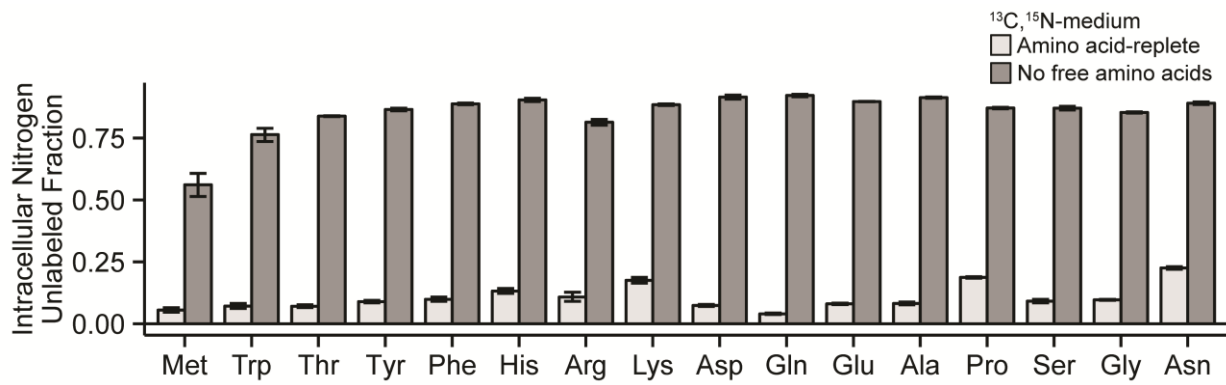

**Figure S8. Fractional contribution of serum protein-derived nitrogen to intracellular amino acid pools.** KRPC cells were grown in amino acid-free medium and supplemented with physiological levels of albumin (5%). Data are means  $\pm$  SE of  $n \geq 3$ .

## Amino acid frequency in BSA relative to all human proteins

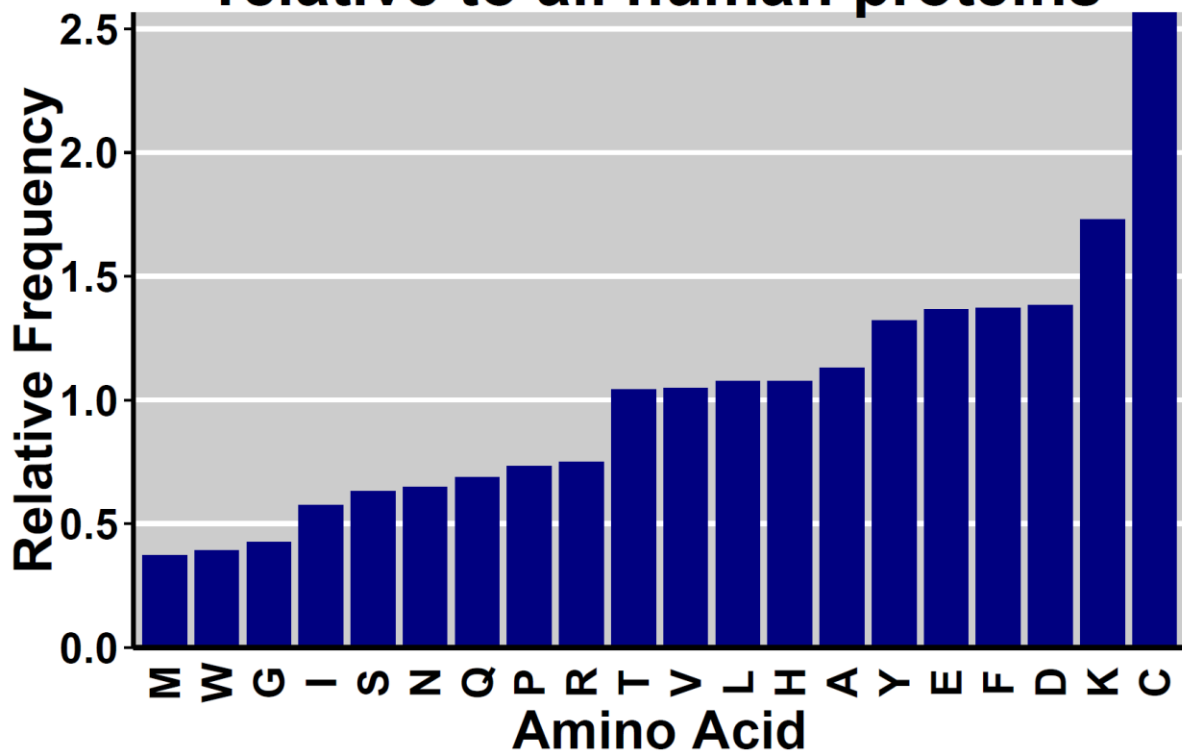

Figure S9. Amino acid frequency in bovine serum albumin relative to human proteome.
